# Supplementary material for: p53, miR-34a and EMP1—Newly Identified Targets of TFF3 Signaling in Y79 Retinoblastoma Cells
Source: Int J Mol Sci. 2019 Aug 24;20(17):4129. doi: 10.3390/ijms20174129 (PMC6747266; doi:10.3390/ijms20174129)
Supplement: Supplementary file 1 [file ijms-20-04129-s001.pdf]

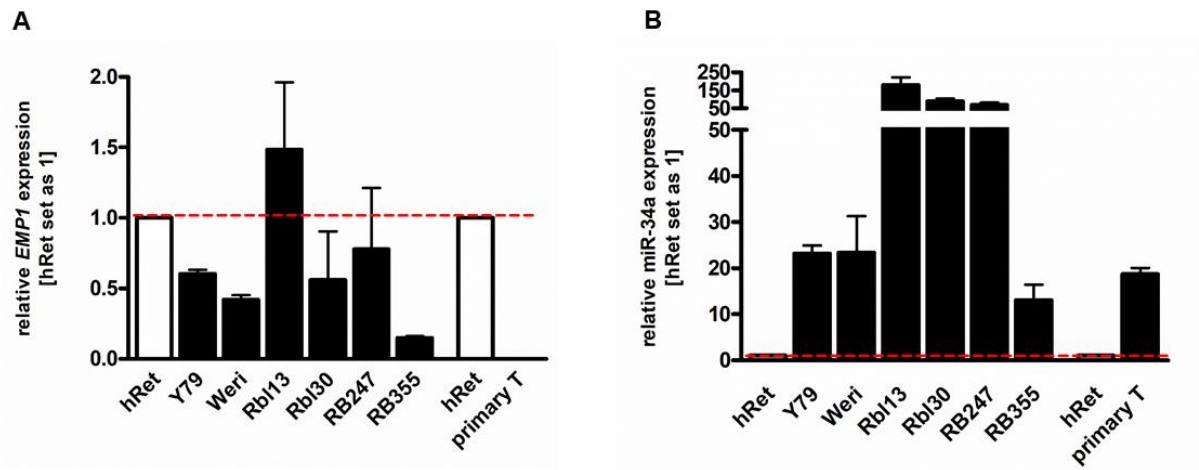

**Figure S1. Endogenous *EMP1* and miR-34a expression levels in different RB cell lines and primary tumor samples.** (A+B) Quantitative Real-time analysis of *EMP1* and miR-34a expression levels of six different RB cell lines (Y79, Wer1, Rbl13, Rbl30, RB247 and RB355) and patients' RB tumors (primary T) compared to a healthy human retina pool (hRet).

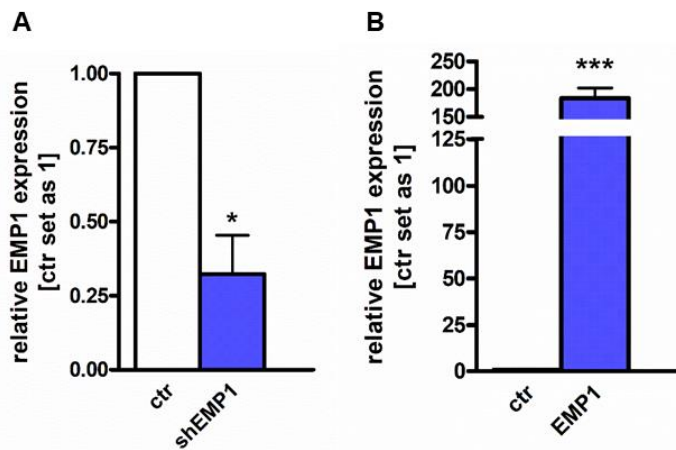

**Figure S2. Relative expression level after lentiviral EMP1 knockdown (A) and EMP1 overexpression (B) in Y79 RB cells compared to control cells.** Values are means from at least 3 independent experiments  $\pm$  SEM. \*\*\*P-value < 0.001 statistical differences compared to the control group calculated by Student's *t*-test.
